# Supplementary material for: Long-Run Trends in Antidepressant Use Among Youths After the FDA Black Box Warning
Source: Atypon-hosted journal article supplement (doi:10.1176/appi.ps.201700089), 2017-12-15

**Appendix A1. List of Antidepressant Prescription Names**

|                                |                      |                        |
|--------------------------------|----------------------|------------------------|
| AMITRIPTYLINE                  | DOXEPIN              | PAROXETINE HCL         |
| AMITRIPTYLINE HCL              | DOXEPIN HCL          | PAROXETINE MESYLATE    |
| AMITRIPTYLINE HCL/PERPHENAZINE | DULOXETINE           | PHENELZINE             |
| AMITRIPTYLINE HCL/PERPHENAZINE | DULOXETINE HCL       | PHENELZINE SULFATE     |
| AMOXAPINE                      | EFFEXOR XR           | PROTRIPTYLINE          |
| BUDERPRION SR                  | ESCITALOPRAM OXALATE | PROTRIPTYLINE HCL      |
| BUDERPRION XL                  | FLUOXETINE           | SERTRALINE             |
| BUDROPION HCL                  | FLUOXETINE HCL       | SERTRALINE HCL         |
| BUDROPION HCL SR               | FLUVOXAMINE          | TRANLYCPROMINE SULFATE |
| BUDROPION XL                   | FLUVOXAMINE MALEATE  | TRAZODONE              |
| BUPROPION                      | IMIPRAMINE           | TRAZODONE HCL          |
| BUPROPION HBR                  | IMIPRAMINE HCL       | TRIMIPRAMINE           |
| BUPROPION HCL                  | IMIPRAMINE PAMOATE   | TRIMIPRAMINE MALEATE   |
| CITALOPRAM                     | ISOCARBOXAZID        | VALPROIC ACID          |
| CITALOPRAM HBR                 | LEXAPRO              | VENLAFAXINE            |
| CITALOPRAM HYDROBROMIDE        | MAPROTILINE          | VENLAFAXINE HCL        |
| CLOMIPRAMINE                   | MAPROTILINE HCL      | VENLAFAXINE HCL ER     |
| CLOMIPRAMINE HCL               | MIRTAZAPINE          |                        |
| CYMBALTA                       | NEFAZODONE           |                        |
| DESIPRAMINE                    | NEFAZODONE HCL       |                        |
| DESIPRAMINE HCL                | NORTRIPTYLINE        |                        |
| DESVENLAFAXINE                 | NORTRIPTYLINE HCL    |                        |
| DESVENLAFAXINE SUCCINATE       | PAROXETINE           |                        |

## Appendix A2. Hosmer-Lemeshow Goodness-of-fit Tests

|              | <b>Model 1 - All</b> | <b>Model 2 - Severe</b> | <b>Model 3 - Non-severe</b> |
|--------------|----------------------|-------------------------|-----------------------------|
| Observations | 75,819               | 14,523                  | 61,296                      |
| F-statistic  | .98                  | 1.24                    | .90                         |
| p-value      | .45                  | .27                     | .53                         |

### Appendix A3. Trends in Any Antidepressant use in Adults (age>18)

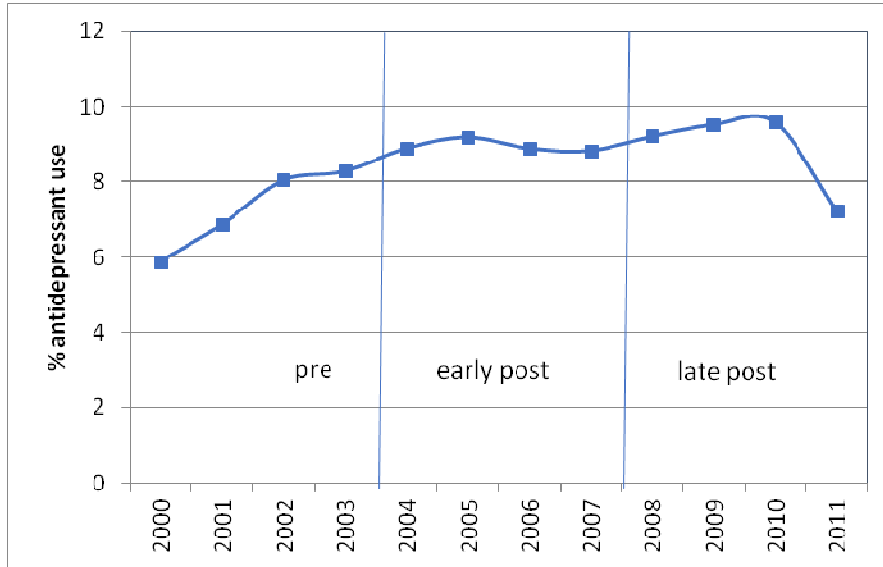

Supplement: appi.ps.201700089.ds001.pdf [file appi.ps.201700089.ds001.pdf]
